# Supplementary material for: Self-assembled structural transition inl-Arg/H-AOT mixtures driven by double hydrogen bonding
Source: Royal Society of Chemistry journal article supplement (doi:10.1039/c6ra07363h), 2016-01-01
Supplement: c6ra07363h1.pdf [file c6ra07363h1.pdf]

**Self-assembled structural transition in L-Arg/H-AOT  
mixtures driven by double hydrogen bonding**

Xiaoyang Li, Yuanyuan Hu, Wenlong Xu, Guihua Li, Aixin Song, and Jingcheng Hao

Key Laboratory of Colloid and Interface Chemistry & Key Laboratory of Special

Aggregated Materials (Shandong University), Ministry of Education, Jinan 250100,

China

E-mail: [songaixin@sdu.edu.cn](mailto:songaixin@sdu.edu.cn)

Tel: +86-531-88363532; Fax: +86-531-88564750 (o)

# Supporting Information

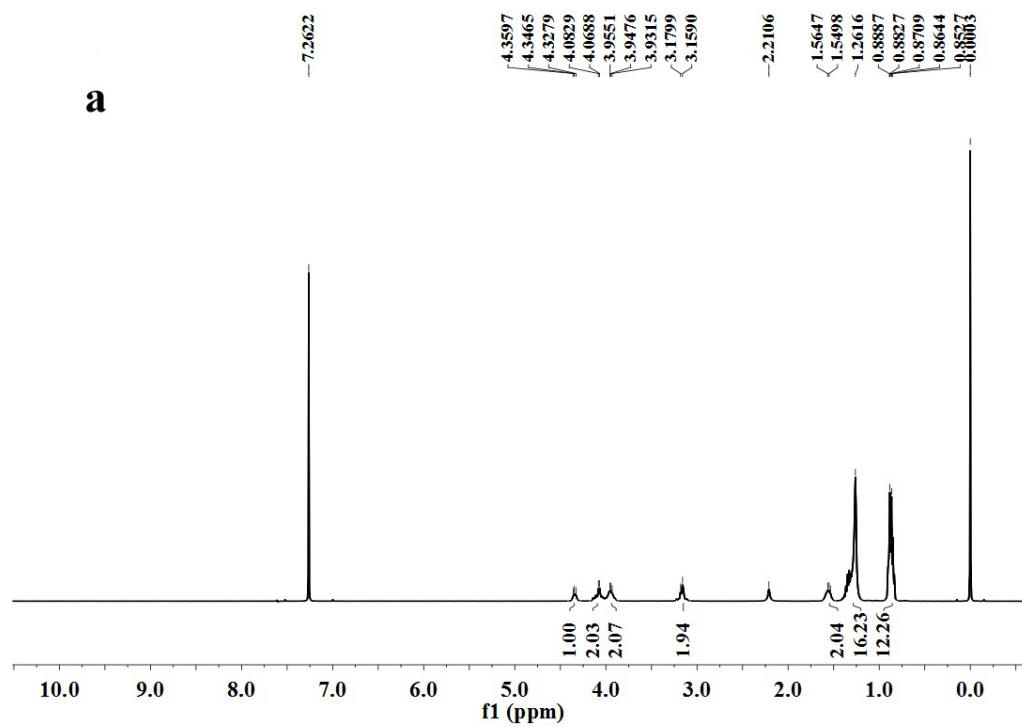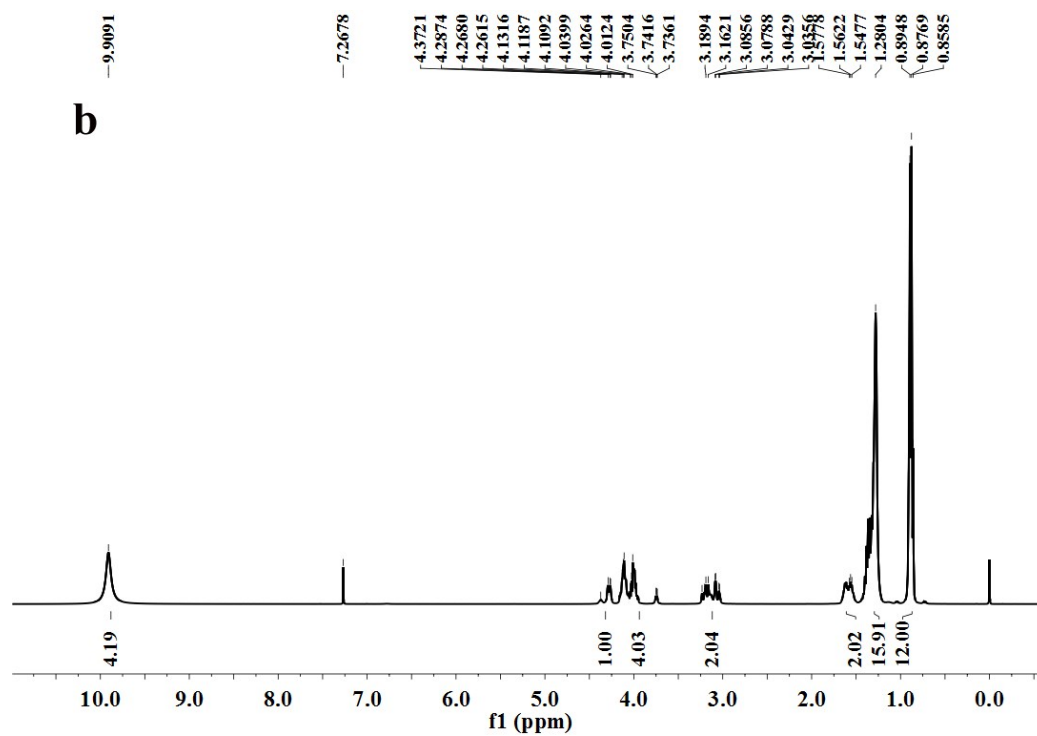

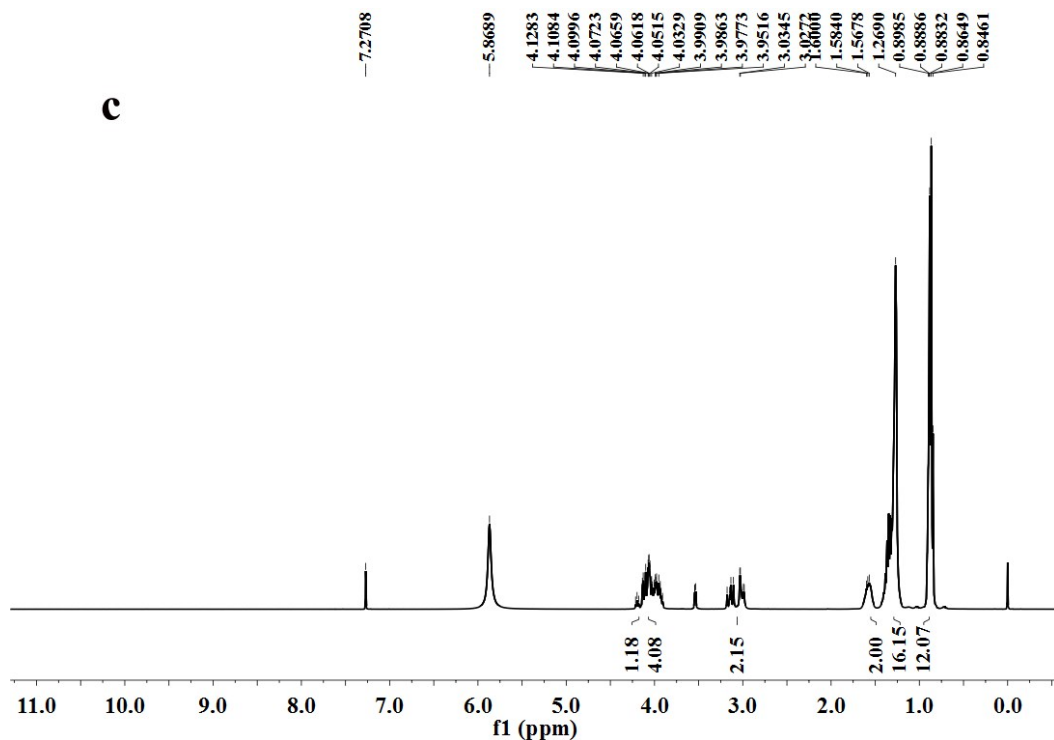

**Fig. S1** The  $^1\text{H}$  NMR spectra of (a) AOT in  $\text{CDCl}_3$ , (b) H-AOT in  $\text{CDCl}_3$ , and (c) H-AOT in  $\text{CDCl}_3$  with the addition of two drops of  $\text{D}_2\text{O}$ .

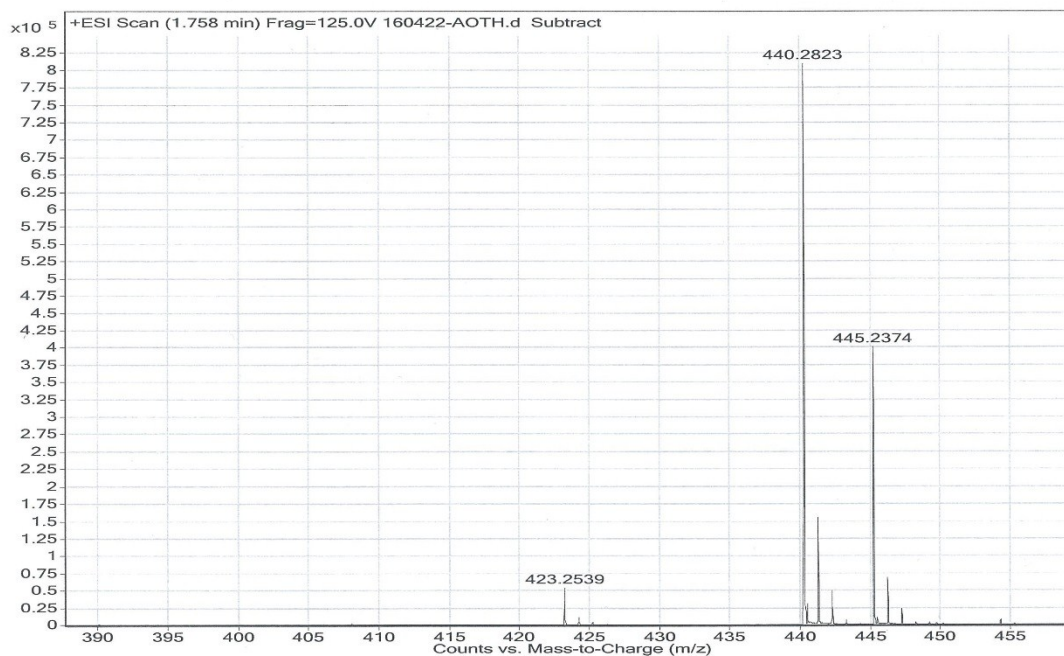

**Fig. S2** EI-MS spectrum (positive ion mode) of H-AOT. H-AOT ( $\text{C}_{20}\text{H}_{38}\text{O}_7\text{S}$ ): 422.2338; Found: 423.2539  $[\text{M}+\text{H}]^+$ , 440.2832  $[\text{M}+\text{NH}_4]^+$ , 445.2374  $[\text{M}+\text{Na}]^+$ .

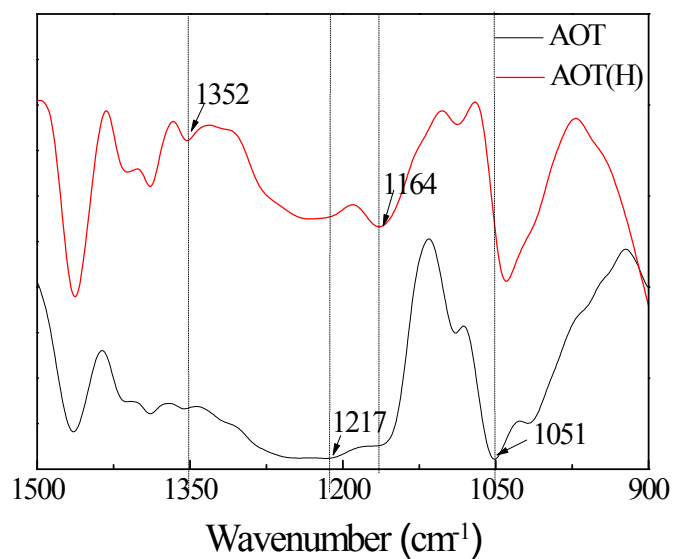

**Fig. S3** FT-IR spectra of AOT and H-AOT. Only the sulfonic acid stretching band at 1164 and 1352 cm<sup>-1</sup> can be observed in FT-IR spectrum of H-AOT instead of the sulfonate stretching band at 1051 and 1217 cm<sup>-1</sup> in that of AOT.

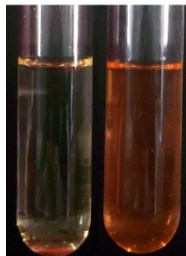

**Fig. S4** Photos of samples of 300 mmol L<sup>-1</sup>L-Arg (left) and 300 mmol L<sup>-1</sup> L-Arg/5 mmol L<sup>-1</sup>c<sub>H-AOT</sub> (right) with the addition of a small amount of hydrophobic dye, Sudan II. It can be found that the dye cannot be dissolved in L-Arg solution, while can be easily solubilized in 300 mmol L<sup>-1</sup> L-Arg/5 mmol L<sup>-1</sup>c<sub>H-AOT</sub> solution.
